# Supplementary material
Source: HighWire-hosted journal article supplement (https://www.cfp.ca/highwire/filestream/36020/field_highwire_adjunct_files/0/RxFiles_Hypoglycemia-perspectives.011.pdf)
Supplement: RxFiles_Hypoglycemia-perspectives.011.pdf [file RxFiles_Hypoglycemia-perspectives.011.pdf]

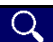

Most patients on insulin – around 7 in 10 – are at low risk of hospitalization for hypoglycemia (i.e. <1% chance per year).<sup>1</sup> Around 1 in 10 are high risk (i.e. >5% chance per year).<sup>1</sup> The rest fall in between. **Regardless of risk level**, all patients on insulin or secretagogues should have their hypoglycemia risk regularly **assessed** (asking *TASTE* questions and adding up *ABCD* risk factors) and **addressed** (thoughtfully applying interventions to lower patient risk when possible). Note that any episode of hypoglycemia can be distressing, and thus **preventing** hypoglycemia is more desirable than **treating** it (see page 28 for acute hypoglycemia treatment). Always use clinical judgement when assessing risk.

## ASSESS

### Ask about hypoglycemia.

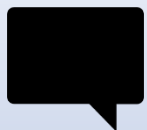

#### Ask *TASTE*

Some patients will not realize they have had hypoglycemia. Asking about specific symptoms can help (see page 28). For example, strange dreams & sweaty sheets in the morning can be a sign of nocturnal hypoglycemia.

- T** Total # of episodes?
- A** Administered carbs?
- S** Symptoms & Severity?
- T** Timing? (e.g. nocturnal, mid-day ...)
- E** Explainable? (e.g. lack of food, extra activity...)

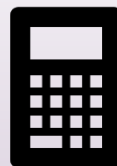

#### Add *ABCD*

### Add up risk factors for hypoglycemia.

- A** **Age**, especially >75 years and as frailty progresses<sup>16</sup>
- B** **Biography** e.g. previous severe hypoglycemia; food insecurity; longstanding diabetes
- C** **Conditions** e.g. renal impairment; serious comorbidities; cognitive impairment
- D** **Drugs** e.g. **insulin**, **secretagogues**, alcohol, quinine, quinolones

**NOTES:** This list is not exhaustive; there are dozens of potential risk factors for hypoglycemia. A risk calculator (some are available online)<sup>19</sup> can be used to classify patients as low or high risk, but this should not replace clinical judgement as not every risk factor will be weighed in a calculator. Lowering the risk of hypoglycemia can be a valuable goal for all patients – not just those at highest risk.

## ADDRESS

|                                                                                                                                        |                                                                                                                                                                                                                                                                                                                                                                                                                                                                                                                                                                                                                                                                                                                                                                                                                                                                                                                                                                                                                                                                                                                                                                                                                                                                                                                            |
|----------------------------------------------------------------------------------------------------------------------------------------|----------------------------------------------------------------------------------------------------------------------------------------------------------------------------------------------------------------------------------------------------------------------------------------------------------------------------------------------------------------------------------------------------------------------------------------------------------------------------------------------------------------------------------------------------------------------------------------------------------------------------------------------------------------------------------------------------------------------------------------------------------------------------------------------------------------------------------------------------------------------------------------------------------------------------------------------------------------------------------------------------------------------------------------------------------------------------------------------------------------------------------------------------------------------------------------------------------------------------------------------------------------------------------------------------------------------------|
| <b>Educate patients &amp; their caregivers</b><br>(Diabetes Educator referral useful)                                                  | Patient education can reduce the risk of hypoglycemia. <b>For example</b> , patients may be educated to: skip prandial insulin or repaglinide when skipping a meal; hold SADMANs meds when at risk for dehydration (see page 37); increase self-monitoring of blood glucose when appropriate (e.g. check in the middle of the night – see page 31); adjust insulin dose to account for physical activity or diet changes; avoid insulin misadventures (e.g. giving basal dose instead of prandial dose; loading wrong cartridge into reusable pen).                                                                                                                                                                                                                                                                                                                                                                                                                                                                                                                                                                                                                                                                                                                                                                        |
| <b>When adding insulin, reassess secretagogue</b>                                                                                      | Limited evidence suggests that combining insulin with a secretagogue may result in a lower insulin dose (e.g. 6-18 less units per day), <sup>15</sup> but may also cause a small increase in the risk of hypoglycemia (e.g. 2% vs 0.6%, <b>NNH=71</b> ). <sup>11,17</sup> Canadian guidelines recommend stopping sulfonylureas when prandial insulin begins. <sup>18</sup>                                                                                                                                                                                                                                                                                                                                                                                                                                                                                                                                                                                                                                                                                                                                                                                                                                                                                                                                                 |
| <b>Improve insulin injection technique</b>                                                                                             | Poor injection technique results in <b>variability</b> in the amount of insulin absorbed. This variability makes it harder to dose insulin accurately, leading to fluctuating levels and a higher hypoglycemia risk. <b>Some common mistakes</b> : injecting into lipohypertrophy; injecting large volumes of insulin into the same site; massaging or applying heat to the injection site; neglecting to roll + invert NPH-containing insulins (NPH / premixes need re-suspension); injecting prandial insulin into the thigh or buttocks. <b>Often ↓ dose after fixing technique!</b>                                                                                                                                                                                                                                                                                                                                                                                                                                                                                                                                                                                                                                                                                                                                    |
| <b>Reassess insulin dose</b>                                                                                                           | Insulin doses frequently need adjustment based on changes to diet, lifestyle, and physiology. In general, when a high insulin dose (basal or prandial) is causing hypoglycemia, decrease that dose by 10-20%. Consider the ratio of basal-to-prandial insulin → hypoglycemia risk appears to be increased when prandial doses make up < 40% or > 70% of total daily insulin. <sup>7</sup> Using <b>basal insulin alone until ~40 units/day</b> in Type 2 Diabetes also appears to ↓ hypoglycemia risk vs using prandial insulin early. <sup>8</sup>                                                                                                                                                                                                                                                                                                                                                                                                                                                                                                                                                                                                                                                                                                                                                                        |
| <b>Adjust medication doses for renal dysfunction</b>  | Many antihyperglycemics need dose adjustments for deteriorating renal function to prevent accumulation and a subsequent increase in the risk of hypoglycemia and other harms (e.g. insulin <45mL/min; glimepiride <60mL/min, etc.) See Diabetes & the Kidneys, page 8.                                                                                                                                                                                                                                                                                                                                                                                                                                                                                                                                                                                                                                                                                                                                                                                                                                                                                                                                                                                                                                                     |
| <b>Review glycemic targets</b><br>see: <i>Glycemic Targets</i> , page 5                                                                | Pursuing an aggressive A1c target increases the risk of hypoglycemia. For example, in the <b>ADVANCE</b> trial an A1c of 6.5% had more episodes of severe hypoglycemia than an A1c of 7.3% (2.7% vs 1.5%, <b>NNH=83</b> ). <sup>9</sup> In the <b>ACCORD</b> trial, an A1c of 6.4% had not only more episodes of severe hypoglycemia than an A1c of 7.5% (16.2% vs 5.1%, <b>NNH=9</b> ), but also an increased risk of <b>death</b> (5% vs 3.95%, <b>NNH=95</b> ). <sup>10</sup> An aggressive A1c target can be appropriate for some patients; in others it creates risk without justifiable benefit.                                                                                                                                                                                                                                                                                                                                                                                                                                                                                                                                                                                                                                                                                                                     |
| <b>Consider whether switching to a different basal insulin would be useful</b>                                                         | <p>Switching insulin is <b>usually the last consideration</b> of hypoglycemia prevention. First, assess insulin <b>doses</b>, <b>technique</b>, <b>targets</b>, etc. See above.</p> <p>There are small, but for some patients potentially important, differences in the rates of hypoglycemia between different basal insulins.</p> <ul style="list-style-type: none"> <li>In <b>low risk</b> patients the choice of basal insulin is unlikely to greatly change the rate of severe hypoglycemia. See Table 1.</li> <li>In <b>high risk</b> patients, insulin degludec may lead to ~1 less episode of <b>severe hypoglycemia</b> for every 100 patients treated per year.<sup>DEVOTE</sup> See Table 1.</li> <li>Long-acting insulin analogues may reduce <b>overall hypoglycemia</b> compared to NPH (Table 2); however, evidence is limited. See page 24 for details.</li> <li>In general, changing insulin agents can be one component of addressing hypoglycemia, but should <b>not</b> be the sole strategy. Trials which showed differences in hypoglycemia risk between basal insulins <b>typically pursued aggressive glycemic targets</b> (e.g. fasting glucose 4-5 mmol/L).<sup>6</sup> Thus, switching agents may be unnecessary if adjusting glycemic targets and/or insulin doses, etc. See above.</li> </ul> |
| <b>Severe hypoglycemia rates:</b> <sup>1</sup><br>in low risk patients: <1%/yr<br>in high risk patients: >5%/yr                        |                                                                                                                                                                                                                                                                                                                                                                                                                                                                                                                                                                                                                                                                                                                                                                                                                                                                                                                                                                                                                                                                                                                                                                                                                                                                                                                            |
| <b>Ensure a hypoglycemia treatment plan is in place</b>                                                                                | A hypoglycemia treatment plan includes patient understanding of the signs of hypoglycemia (sweating, etc.), and what action to take (e.g. eat fast-acting sugar). In general, glucagon should be prescribed to all patients with type 1 diabetes & all patients at <b>high risk</b> of severe hypoglycemia (see <b>Assess: ABCD</b> above). Refer to page 28.                                                                                                                                                                                                                                                                                                                                                                                                                                                                                                                                                                                                                                                                                                                                                                                                                                                                                                                                                              |

**Table 1: Estimations of severe hypoglycemia rates, by basal insulin.<sup>2</sup>**

|                    | # of patients who may experience a severe hypoglycemic episode each year |                                                       |                                              |                               |
|--------------------|--------------------------------------------------------------------------|-------------------------------------------------------|----------------------------------------------|-------------------------------|
|                    | NPH <sup>3</sup>                                                         | glargine LANTUS/BASAGLAR<br>100 units/mL <sup>4</sup> | glargine TOUJEO<br>300 units/mL <sup>5</sup> | degludec <sup>6</sup> TRESIBA |
| low risk patients  | < 1 in 100                                                               | < 1 in 100                                            | < 1 in 100                                   | < 1 in 100                    |
| high risk patients | ~ 5 in 100                                                               | ~ 5 in 100                                            | ~ 5 in 100                                   | ~ 4 in 100                    |

Assumptions:<sup>2</sup> no change in baseline risk<sup>1</sup> with NPH or glargine,<sup>3,4,5</sup> and a 25% risk reduction with degludec.<sup>6</sup>

**Table 2: Head-to-head overall hypoglycemia rates between basal insulins.**

|                                     |                                                                         |
|-------------------------------------|-------------------------------------------------------------------------|
| CADTH meta-analysis: <sup>4</sup>   | NPH: 55.9% vs glargine: 47.2%; <b>NNT= 12</b> over 6-12 months          |
| EDITION meta-analysis: <sup>5</sup> | glargine 100: 72.8% vs glargine 300: 66.5%; <b>NNT=16</b> over 6 months |
| SWITCH-2 trial: <sup>14</sup>       | glargine 100: 31.6% vs degludec 22%; <b>NNT=11</b> over 7 months        |

References

1. Karter AJ, Warton EM, Lipska KJ, Ralston JD, Moffet HH, Jackson GG, Huang ES, Miller DR. Development and validation of a tool to identify patients with type 2 diabetes at high risk of hypoglycemia-related emergency department or hospital use. JAMA internal medicine. 2017 Oct 1;177(10):1461-70.

2. Baseline assumptions that went into Table 1:

a. *Patients can be divided into high risk and low risk.* This was supported by Karter et al,<sup>1</sup> who reported that of 33198 patients taking insulin, 2753 patients had a rate of severe hypoglycemia of 5.1% per year (risk factors: on insulin with 1-2 prior hypoglycemia-related ED or hospital encounters) and 23018 patients had a rate of 0.7% per year (risk factors: on insulin, no prior hypoglycemia-related ED or hospital encounters, age < 77 years, and less than 2 overall ED visits in the prior year).

b. *Results from RCTs can be applied to patient groups outside of the RCT.* In general, patients enrolled in insulin RCTs were insulin-experienced and treated aggressively. It is uncertain if this can be applied to all real-world patients; thus Table 1 might be viewed as a best-case scenario.

c. *Results from RCTs are scalable.* For example, if a trial showed a decrease in hypoglycemia from 8% to 6% (a 25% risk reduction), then in a group of patients with a different level of risk the same 25% risk reduction would still apply (e.g. reducing risk from 4% to 3%).

3. Tools for Practice #35. The long and short of long acting insulin analogues (versus NPH)? Accessed May 22, 2020. Available from [https://gomainpro.ca/wp-content/uploads/tools-for-practice/1528907129\\_updatedtfp35insulinanalogues.pdf](https://gomainpro.ca/wp-content/uploads/tools-for-practice/1528907129_updatedtfp35insulinanalogues.pdf). **No difference was found in severe hypoglycemia rates between insulin NPH, insulin glargine, and insulin detemir.**

4. CADTH. Long-Acting Insulin Analogues for the Treatment of Diabetes Mellitus: Meta-analyses of clinical Outcomes. Accessed May 22, 2020. Available from [https://www.cadth.ca/media/pdf/compus\\_Long-Acting-Insulin-Analogs-Report\\_Clinical-Outcomes.pdf](https://www.cadth.ca/media/pdf/compus_Long-Acting-Insulin-Analogs-Report_Clinical-Outcomes.pdf). **No difference was found in severe hypoglycemia rates between insulin NPH, insulin glargine, and insulin detemir.** The rate of overall hypoglycemia between insulin NPH and insulin glargine was reported in Figure 32: 737/1319 (56%) for NPH and 625/1323 (47%) for glargine. The duration of the 8 quoted trials were 1 year, 24 weeks, 4 weeks, 1 year, 24 weeks, 36 weeks, 24 weeks, and 12 weeks.

5. **EDITON meta-analysis.** Ritzel R, Roussel R, Bolli GB, Vinet L, Brulle-Wohlhueter C, Glezer S, Yki-Järvinen H. Patient-level meta-analysis of the EDITON 1, 2 and 3 studies: glycaemic control and hypoglycaemia with new insulin glargine 300 U/ml versus glargine 100 U/ml in people with type 2 diabetes. Diabetes, Obesity and Metabolism. 2015 Sep;17(9):859-67. **No difference was found in severe hypoglycemia rates between insulin glargine 100 units/mL and insulin glargine 300 units/mL.** The rates of overall hypoglycemia for glargine 100 units/mL and glargine 300 units/mL were not reported in this meta-analysis, but can be gathered from the individual trials:

| Overall Hypoglycemia Rates: Edition Trials                               |                 |                 |                 |               |               |
|--------------------------------------------------------------------------|-----------------|-----------------|-----------------|---------------|---------------|
| Edition 1                                                                |                 | Edition 2       |                 | Edition 3     |               |
| 100u                                                                     | 300u            | 100u            | 300u            | 100u          | 300u          |
| 88.6% (356/402)                                                          | 83.4% (337/404) | 79.3% (322/407) | 71.5% (288/404) | 53% (230/438) | 46% (201/435) |
| Pooled overall hypoglycemia for glargine 100 units/mL = 908/1247 = 72.8% |                 |                 |                 |               |               |
| Pooled overall hypoglycemia for glargine 100 units/mL = 826/1243 = 66.5% |                 |                 |                 |               |               |
| Calculated NNT = 16                                                      |                 |                 |                 |               |               |

6. Marso SP, McGuire DK, Zinman B, Poulter NR, Emerson SS, Pieber TR, Pratley RE, Haahr PM, Lange M, Brown-Frandsen K, Moses A. Efficacy and safety of degludec versus glargine in type 2 diabetes. New England Journal of Medicine. 2017 Aug 24;377(8):723-32. Rates of severe hypoglycemia were 6.6% in the insulin glargine group and 4.9% in the insulin degludec group over the course of 2 years, equaling a NNT of 59 over 2 years or 118 per year, and a **25% risk reduction**. For the purpose of Table 1, we have defined high risk patients as 5% risk per year,<sup>1</sup> thus a 25% risk reduction would decrease the risk to 4% per year. Applying the 25% risk reduction to low risk patients, whose baseline risk is 0.7% per year,<sup>1</sup> decreases the risk to 0.525% per year. This calculates to a NNT ≈ 600 per year, which was not felt to be clinically important.

7. **4-T: 3-year Followup.** Holman RR, Farmer AJ, Davies MJ, Levy JC, Darbyshire JL, Keenan JF, Paul SK. Three-year efficacy of complex insulin regimens in type 2 diabetes. New England Journal of Medicine. 2009 Oct 29;361(18):1736-47.

8. **4-T.** Holman RR, Thorne KI, Farmer AJ, Davies MJ, Keenan JF, Paul S, Levy JC. Addition of biphasic, prandial, or basal insulin to oral therapy in type 2 diabetes. New England Journal of Medicine. 2007 Oct 25;357(17):1716-30.

9. **ADVANCE.** ADVANCE Collaborative Group, Patel A, MacMahon S, Chalmers J, Neal B, Billot L, Woodward M, Marre M, Cooper M, Glasziou P, Grobbee D, Hamet P, Harrap S, Heller S, Liu L, Mancia G, Mogensen CE, Pan C, Poulter N, Rodgers A, Williams B, Bompont S, de Galan BE, Joshi R, Travert F. Intensive blood glucose control and vascular outcomes in patients with type 2 diabetes. N Engl J Med. 2008 Jun 12;358(24):2560-72.

10. **ACCORD.** ACCORD Study Group. Effects of intensive blood-pressure control in type 2 diabetes mellitus. New England Journal of Medicine. 2010 Apr 29;362(17):1575-85.

11. Hypoglycemia with insulin and sulfonylureas Karyn B. Kolman, Joshua Freeman, Carol L. Howe Canadian Family Physician May 2020 , 66 (5) 335;

12. **SWITCH-2.** Wysham C, Bhargava A, Chaykin L, de la Rosa R, Handelsman Y, Troelsen LN, Kvist K, Norwood P. Effect of insulin degludec vs insulin glargine U100 on hypoglycemia in patients with type 2 diabetes: the SWITCH 2 randomized clinical trial. Jama. 2017 Jul 4;318(1):45-56.

13. Yale JF, Paty B, Senior PA. Hypoglycemia. Canadian journal of diabetes. 2018 Apr 1;42:S104-8.

14. RxFiles: Hypoglycemia. Available from <https://www.rxfiles.ca/RxFiles/uploads/documents/members/cht-hypoglycemia.pdf>

15. Johnson JL, Wolf SL, Kabadi UM. Efficacy of insulin and sulfonylurea combination therapy in type II diabetes: a meta-analysis of the randomized placebo-controlled trials. Archives of internal medicine. 1996 Feb 12;156(3):259-64.

16. Kirkman MS, Briscoe VJ, Clark N, Florez H, Haas LB, Halter JB, Huang ES, Korytkowski MT, Munshi MN, Odegard PS, Pratley RE. Diabetes in older adults. Diabetes care. 2012 Dec 1;35(12):2650-64.

17. Mogensen UM, Andersson C, Fosbøl EL, Schramm TK, Vaag A, Scheller NM, Torp-Pedersen C, Gislason G, Køber L. Sulfonylurea in combination with insulin is associated with increased mortality compared with a combination of insulin and metformin in a retrospective Danish nationwide study. Diabetologia. 2015 Jan 1;58(1):50-8.

18. Gerstein HC, Colhoun HM, Dagenais GR, Diaz R, Lakshmanan M, Pais P, Probstfield J, Riesmeyer JS, Riddle MC, Rydén L, Xavier D. Dulaglutide and cardiovascular outcomes in type 2 diabetes (REWIND): a double-blind, randomised placebo-controlled trial. The Lancet. 2019 Jul 13;394(10193):121-30.
19. e.g. <https://www.mdcalc.com/hypoglycemia-risk-score>
20. **EDITION 1.** Riddle MC, Bolli GB, Ziemien M, Muehlen-Bartmer I, Bizet F, Home PD. New insulin glargine 300 units/mL versus glargine 100 units/mL in people with type 2 diabetes using basal and mealtime insulin: glucose control and hypoglycemia in a 6-month randomized controlled trial (EDITION 1). Diabetes care. 2014 Oct 1;37(10):2755-62.
21. **EDITION 2.** Yki-Järvinen H, Bergenstal R, Ziemien M, Wardecki M, Muehlen-Bartmer I, Boelle E, Riddle MC. New insulin glargine 300 units/mL versus glargine 100 units/mL in people with type 2 diabetes using oral agents and basal insulin: glucose control and hypoglycemia in a 6-month randomized controlled trial (EDITION 2). Diabetes Care. 2014 Dec 1;37(12):3235-43.
22. **EDITION 3.** Bolli GB, Riddle MC, Bergenstal RM, Ziemien M, Sestakauskas K, Goyeau H, Home PD, EDITION 3 study investigators. New insulin glargine 300 U/ml compared with glargine 100 U/ml in insulin-naïve people with type 2 diabetes on oral glucose-lowering drugs: a randomized controlled trial (EDITION 3). Diabetes, Obesity and Metabolism. 2015 Apr;17(4):386-94.
